# Supplementary material for: Gamifying Self-Management of Chronic Illnesses: A Mixed-Methods Study
Source: PubMed Central journal article supplement (PMC5035381; doi:10.2196/games.5943), 2016-09-09
Supplement: games_v4i2e14_app1.pdf [file games_v4i2e14_app1.pdf]

## Appendix A

The table below shows the questions, median, and *P* value. The themes are shown as follows: Fun (F), Socializing (So), Esteem (E), Self-management (S-M), Motivation (M), Growth (G), Self-representation (S-R), and Sustainability (Su).

Analysis of The Questionnaire

|     | Q  | Question/s                                                                                                                                        | M   | P     |
|-----|----|---------------------------------------------------------------------------------------------------------------------------------------------------|-----|-------|
| F   | 1  | It is important for me when I use an App for diabetes that it is not boring in its design and usage.                                              | 4   | <.001 |
|     | 2  | The best social networks are the ones containing entertainment features.                                                                          | 4   | <.001 |
|     | 3  | I feel satisfied when my work in self-managing my diabetes is appreciated.                                                                        | 5   | <.001 |
|     | 4  | I will work relentlessly to always keep a record of my test results if I have the opportunity to positively compete with other diabetic patients. | 4   | <.001 |
|     | 5  | The availability of different types of motivators in the diabetic social networks will encourage me to promptly record my tests.                  | 4   | <.001 |
| S   | 6  | I like to share my positive results with others                                                                                                   | 4   | <.001 |
|     | 7  | I prefer to interact with diabetic patients through the internet but not in real life.                                                            | 3   | .334  |
|     | 8  | I would like to make friendships with diabetic patients.                                                                                          | 4   | <.001 |
|     | 9  | Communicating with diabetic friends will help me cope with diabetes.                                                                              | 4   | <.001 |
|     | 10 | Social networks help me cope with diabetes.                                                                                                       | 4   | <.001 |
|     | 11 | Being part of a diabetic-oriented social network will help me to live positively with diabetes.                                                   | 4   | <.001 |
|     | 12 | The social support that I receive from the Internet is important to me.                                                                           | 4   | <.001 |
|     | 13 | It is difficult for my non-diabetic friends to understand and appreciate my situation.                                                            | 4   | .0476 |
| E   | 14 | I would like to participate in a social network that enables me to communicate with diabetic patients.                                            | 4   | <.001 |
|     | 15 | I will be more encouraged to self-manage my diabetes if I see other patients' records\progress.                                                   | 4   | <.001 |
|     | 16 | I would like to share my diabetes tests with other diabetic friends, especially the positive results.                                             | 4   | <.001 |
| S-M | 17 | I will be motivated to support others if I participate in a social network for diabetes.                                                          | 4.5 | <.001 |
|     | 18 | I only record my tests to show them to my doctor                                                                                                  | 4   | .006  |
| M   | 19 | A self-management system for diabetes is beneficial if it provides feedback to the users based on their entries.                                  | 4   | <.001 |
|     | 20 | I lack self-motivation to keep a record and follow up my situation in a daily basis.                                                              | 3   | .102  |

|     |    |                                                                                                                                                                                                        |   |       |
|-----|----|--------------------------------------------------------------------------------------------------------------------------------------------------------------------------------------------------------|---|-------|
|     | 21 | I am well aware of the importance of my role in managing my diabetes.                                                                                                                                  | 5 | <.001 |
|     | 22 | I would like to self-manage my condition as best as possible along with keeping my routinely meetings with the doctor.                                                                                 | 4 | <.001 |
| G   | 23 | I would like to receive notifications every time I record my test results, and for them to be compared to my previous tests.                                                                           | 4 | <.001 |
|     | 24 | I would like to be notified with my glucose level fluctuates abnormally.                                                                                                                               | 5 | <.001 |
|     | 25 | My understanding of how to self-manage my situation makes me feel secure and content.                                                                                                                  | 4 | <.001 |
|     | 26 | It is important to me to control my health through improving my self-management skills.                                                                                                                | 4 | <.001 |
|     | 27 | When I use a new App, it is important for me that it helps me achieve my goals that are related to my situation. (E.g. achieving a certain level of glucose, or burning a certain number of calories.) | 4 | <.001 |
| S-R | 28 | I would like my virtual account on the Internet (profile, photo, etc.) to reflect my personality.                                                                                                      | 4 | <.001 |
|     | 29 | I do not use Arabic Apps (mobile or computer) because of the bad design and quality.                                                                                                                   | 3 | .148  |
|     | 30 | Diabetes is negatively looked at in Saudi Arabia                                                                                                                                                       | 3 | .067  |
| Su  | 31 | When using a diabetes management App, it is important that it is regularly updated.                                                                                                                    | 4 | <.001 |
|     | 32 | I need to be encouraged in order to keep recording my test on a daily basis.                                                                                                                           | 4 | <.001 |
|     | 33 | I feel bored when using an app for several times.                                                                                                                                                      | 3 | .185  |
|     | 34 | I enjoy being challenged at a level that suits me when I play in my mobile or computer                                                                                                                 | 4 | <.001 |
